# Supplementary material for: Determining the Impact of Heatwaves on Emergency Ambulance Calls in Queensland: A Retrospective Population-Based Study
Source: MDPI journal article supplement (doi:10.3390/ijerph20064875), 2023-03-10
Supplement: s1 [file s1]

**Figure S1-** Number of heatwave days per postcode (Queensland; 2010-2019).

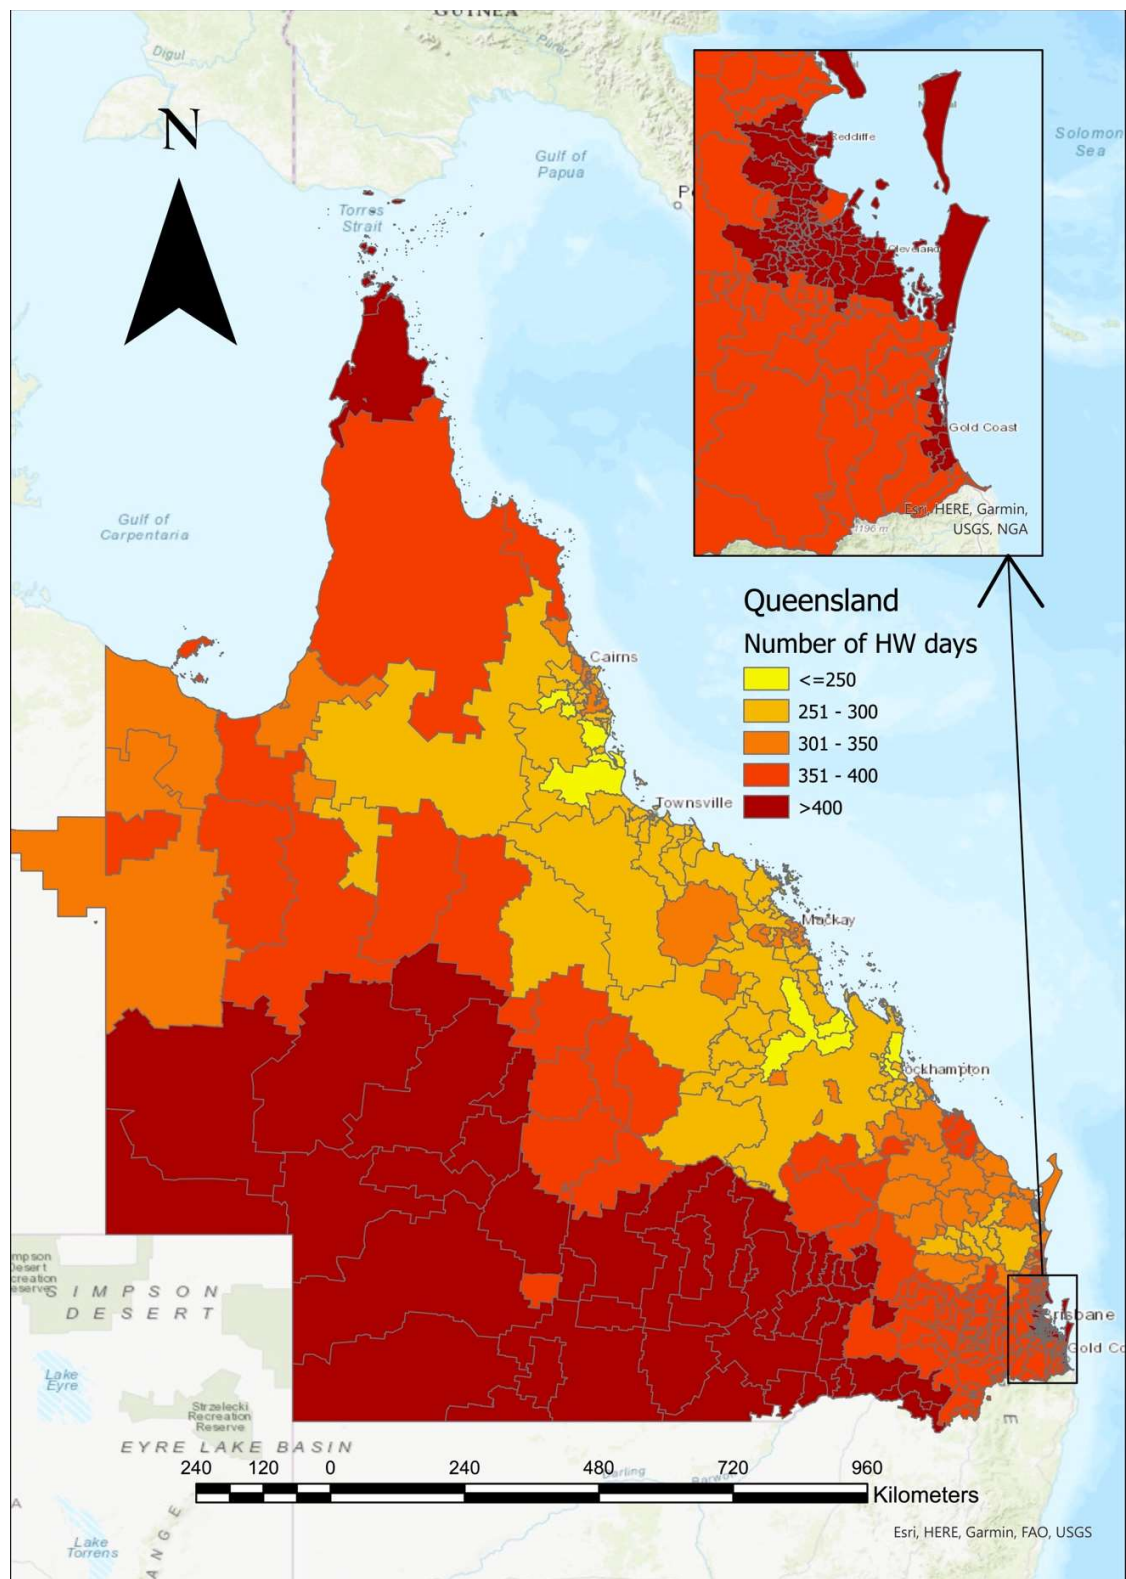

**Supplementary Table 1-** Suggested broad MPDS categories

|                   |                                                                                                                                                                                                                                                                                                                                                                                                                                                                                                                                                                                                                                         |
|-------------------|-----------------------------------------------------------------------------------------------------------------------------------------------------------------------------------------------------------------------------------------------------------------------------------------------------------------------------------------------------------------------------------------------------------------------------------------------------------------------------------------------------------------------------------------------------------------------------------------------------------------------------------------|
| Cardiac           | <p>9 - Cardiac or Respiratory Arrest / Death<br/> 10 - Chest Pain / Chest Discomfort (non-traumatic);<br/> 19 - Heart Problems (AICD)</p> <p>[note: there is some crossover between subgroups of card 9 and other categories (e.g., intentional trauma resulting in cardiac arrest (which could be coded to mental health or injury), or unintentional trauma resulting in cardiac arrest (which could be coded to injury).</p>                                                                                                                                                                                                         |
| Stroke            | 28 -Stroke (CVA ) / Transient Ischaemic Attack (TIA)                                                                                                                                                                                                                                                                                                                                                                                                                                                                                                                                                                                    |
| Mental Health     | 25 -Psychiatric / Abnormal Behaviour / Suicide Attempt.                                                                                                                                                                                                                                                                                                                                                                                                                                                                                                                                                                                 |
| Specified Medical | <p>1 - Abdominal pain/problems;<br/> 2 – allergies (include only 02E01, 02D01, 02D02, 02C01, 02C02, 02B01, 02A01, as other codes relate to envenomation);<br/> 5 - back pain (non-traumatic or non-recent trauma);<br/> 12 - convulsions/fittings<br/> 13 - diabetic problems;<br/> 16 – eye problems (only 16D01, 16A03)<br/> 18 - headache;<br/> 21 haemorrhage (medical related) – includes only 21C01, 21C02, 21C03, 21B03, 21B04, and any codes with suffix M (others are trauma related)<br/> 26 - sick persons (specific diagnosis)<br/> 31 - unconscious fainting (near);<br/> 32 - unknown problems (collapse, 3rd party);</p> |
| Obstetric         | 24 – pregnancy / childbirth/ miscarriage                                                                                                                                                                                                                                                                                                                                                                                                                                                                                                                                                                                                |
| Respiratory       | 6 - breathing problems;                                                                                                                                                                                                                                                                                                                                                                                                                                                                                                                                                                                                                 |

|                    |                                                                                                                                                                                                                                                                                                                                                                                                                                                                                                                                                                                                                                                                                                                                                                                                                                                                                                                                                                                                                                                                       |
|--------------------|-----------------------------------------------------------------------------------------------------------------------------------------------------------------------------------------------------------------------------------------------------------------------------------------------------------------------------------------------------------------------------------------------------------------------------------------------------------------------------------------------------------------------------------------------------------------------------------------------------------------------------------------------------------------------------------------------------------------------------------------------------------------------------------------------------------------------------------------------------------------------------------------------------------------------------------------------------------------------------------------------------------------------------------------------------------------------|
| Injuries           | <p>2 – allergies/bites/stings (envenomation) – this includes only 02D03, 02D04, 02D05, 02D06, 02D07, 02A02 [all other 02 codes are most likely allergies]</p> <p>3 – animal bites/attacks;</p> <p>4 – assault/sexual assault;</p> <p>7 – burns (scalds) / explosion (blast);</p> <p>8 – hazardous exposure (carbon monoxide, inhalation / chemical, biological, radiological, nuclear);</p> <p>11 – choking;</p> <p>14 – drowning/near drowning /diving/scuba incident;</p> <p>15 – electrocution / lightning;</p> <p>16 – eye injuries [includes 16B01, 16A01, 16A02]; [other 16 codes are not injuries]</p> <p>17 – falls;</p> <p>21 – haemorrhage/lacerations; [this <b>excludes</b> 21C01, 21C02, 21C03, 21B03, 21B04, and any codes with suffix M, as these are all medically related, not injury-related]</p> <p>22 – inaccessible incident /other entrapments (non-traffic)</p> <p>23 – overdose/poisoning (ingestion);</p> <p>27 – stab / gunshot / penetrating trauma;</p> <p>29 – traffic/transport incidents</p> <p>30 – traumatic injuries (specific)</p> |
| Heat/cold exposure | Codes with suffix H are heat-related; codes with suffix C are cold-related                                                                                                                                                                                                                                                                                                                                                                                                                                                                                                                                                                                                                                                                                                                                                                                                                                                                                                                                                                                            |

**Figure S2-** Number of heatwave days per postcode (Queensland; 2010-2011).

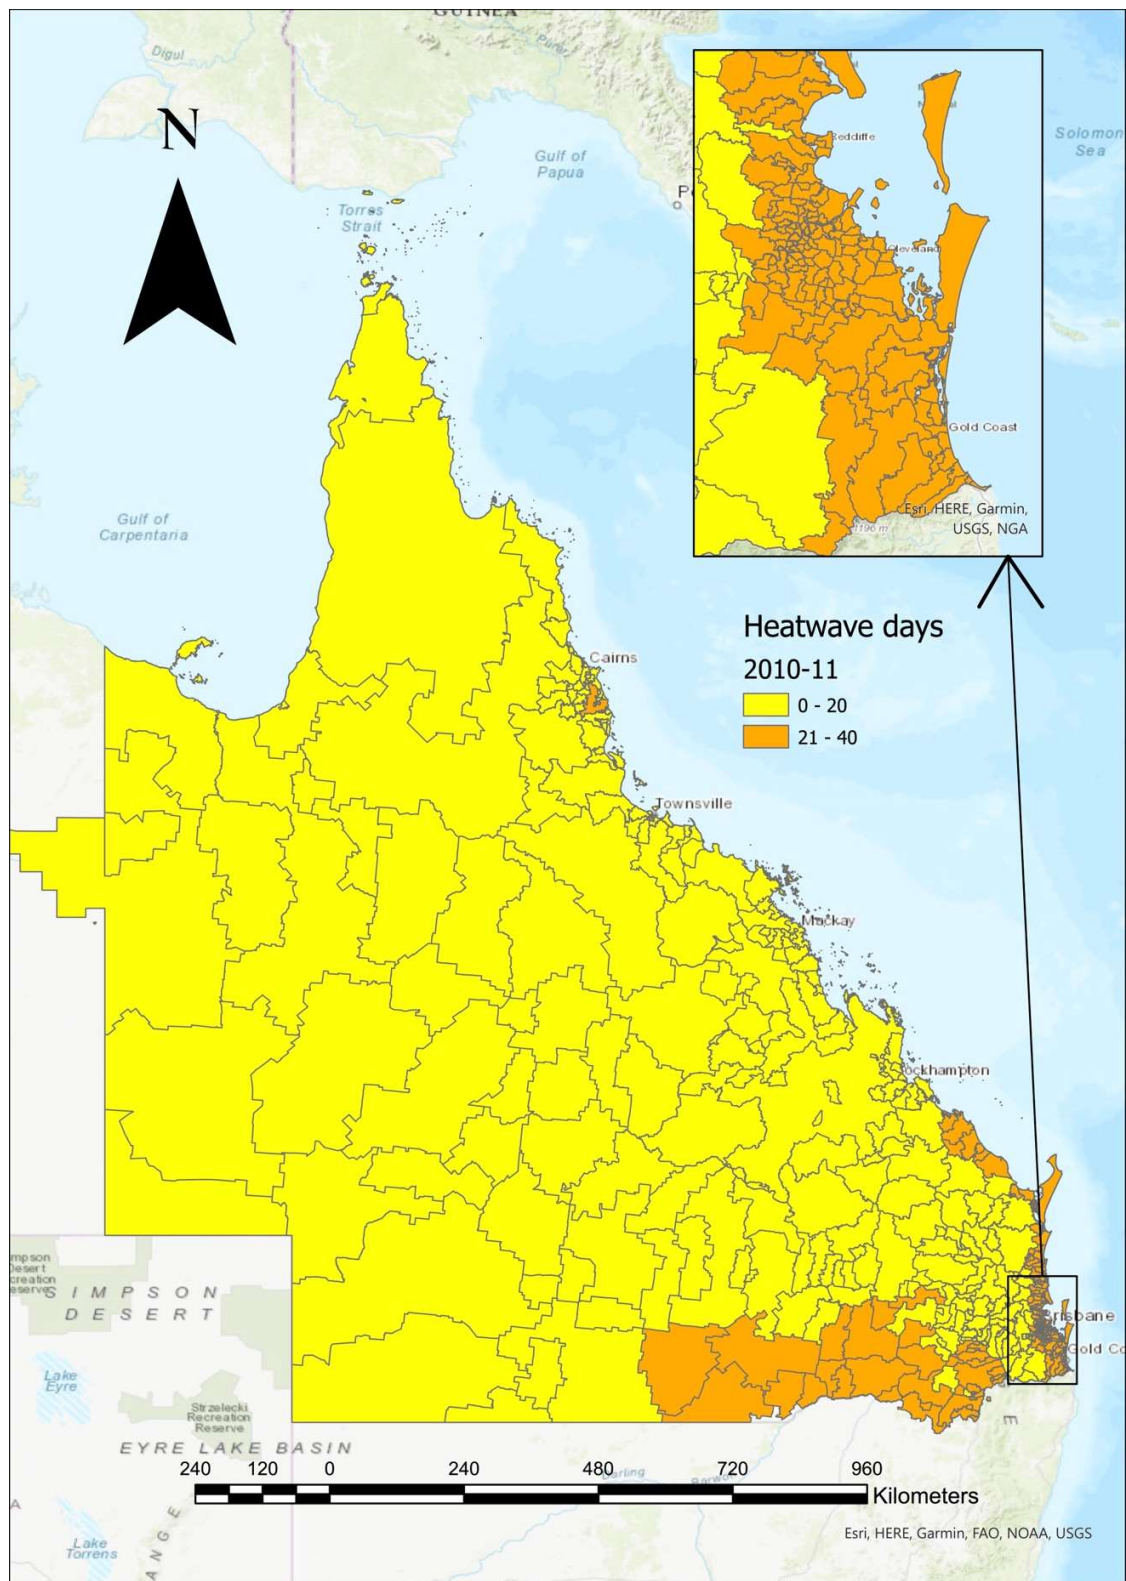

**Figure S3-** Number of heatwave days per postcode (Queensland; 2011-2012).

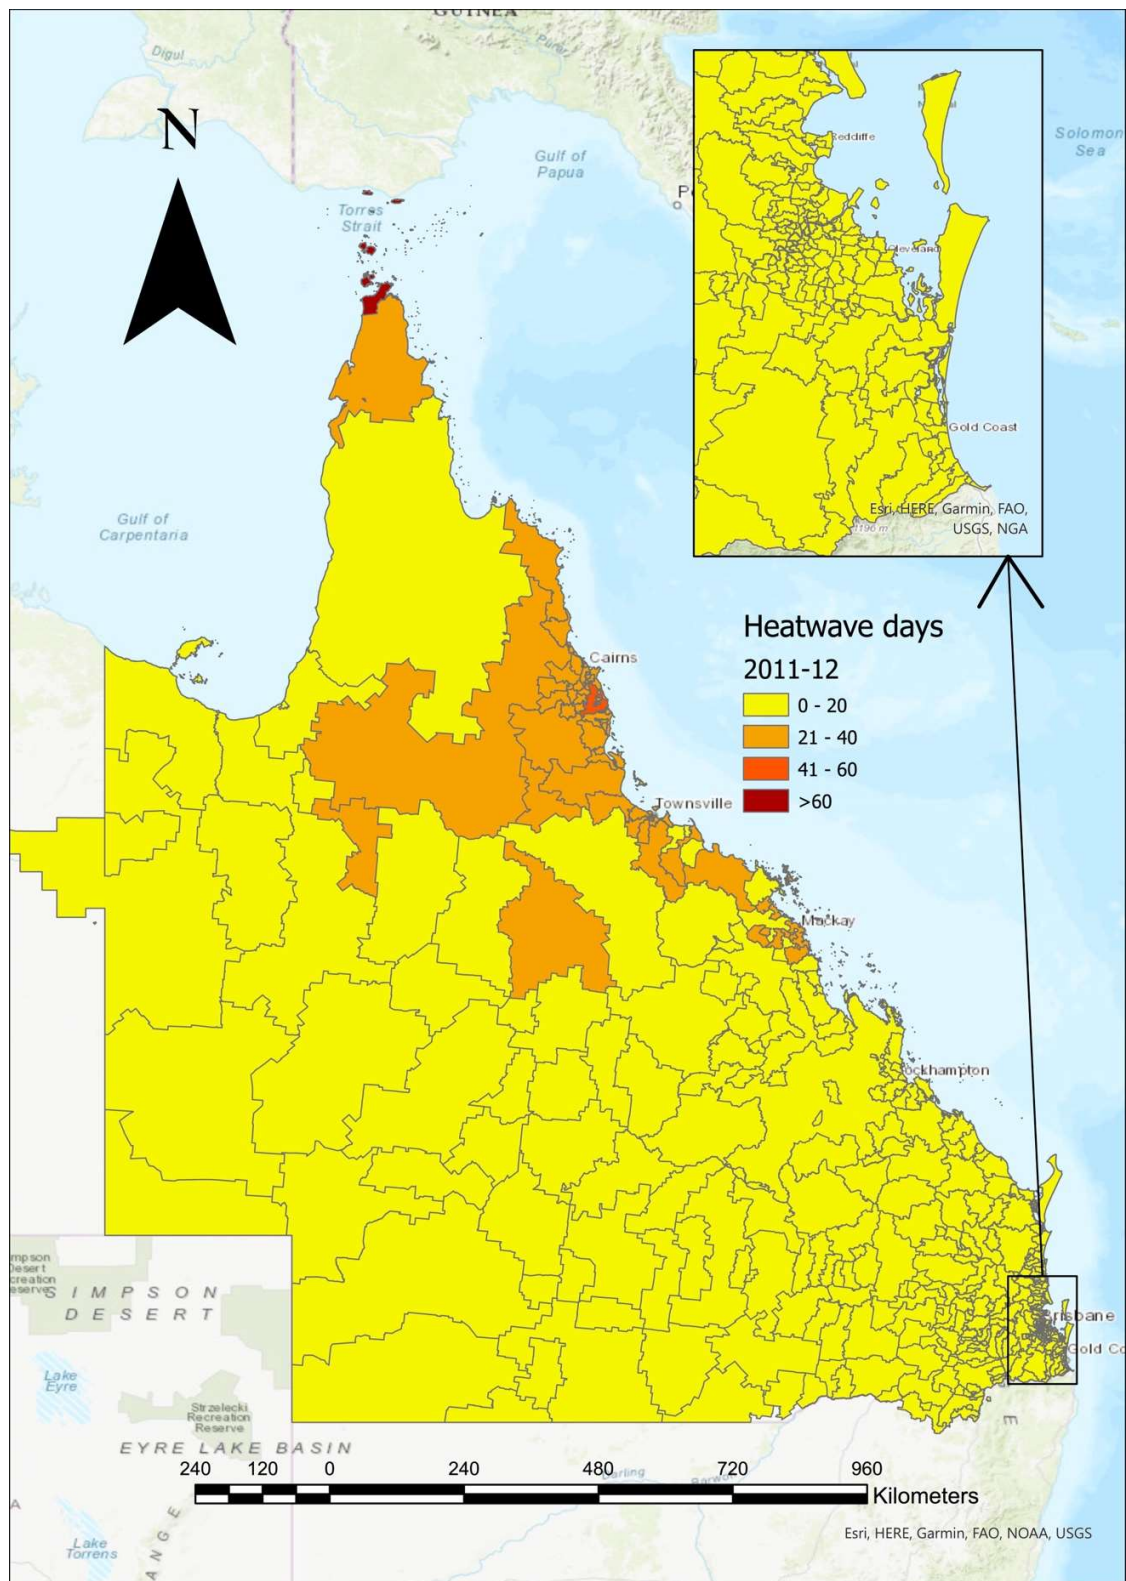

**Figure S4-** Number of heatwave days per postcode (Queensland; 2012-2013).

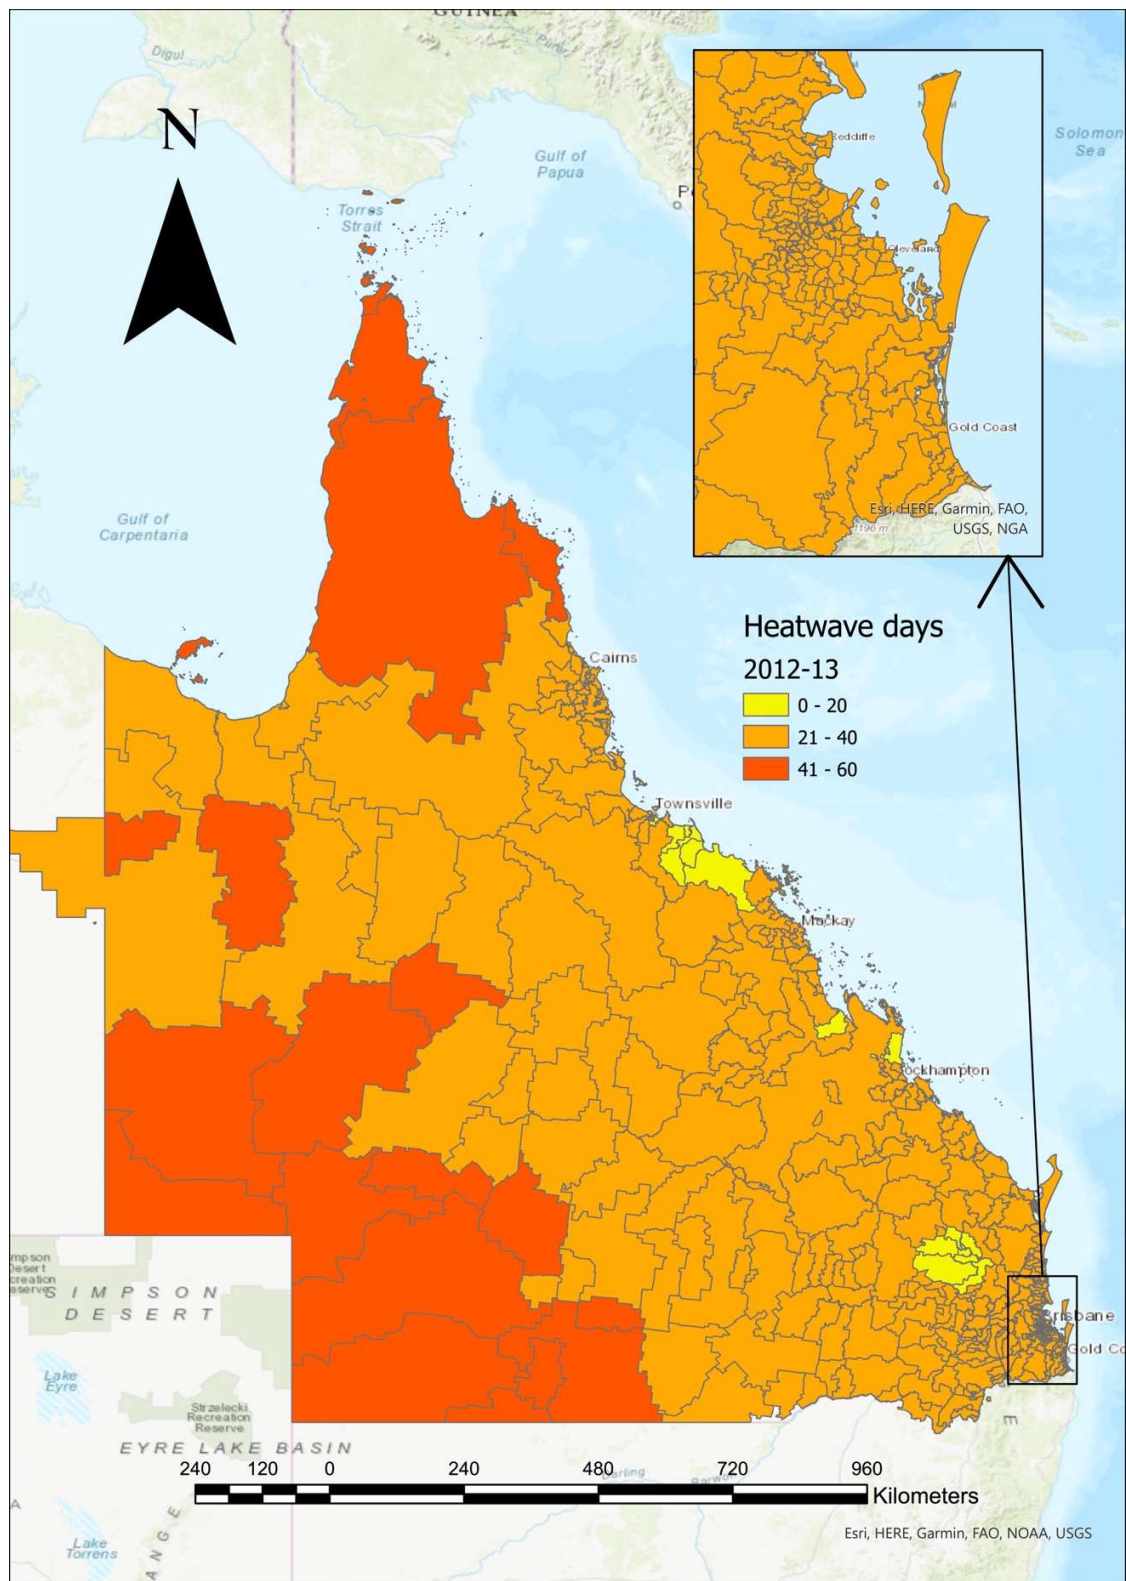

**Figure S5-** Number of heatwave days per postcode (Queensland; 2013-2014).

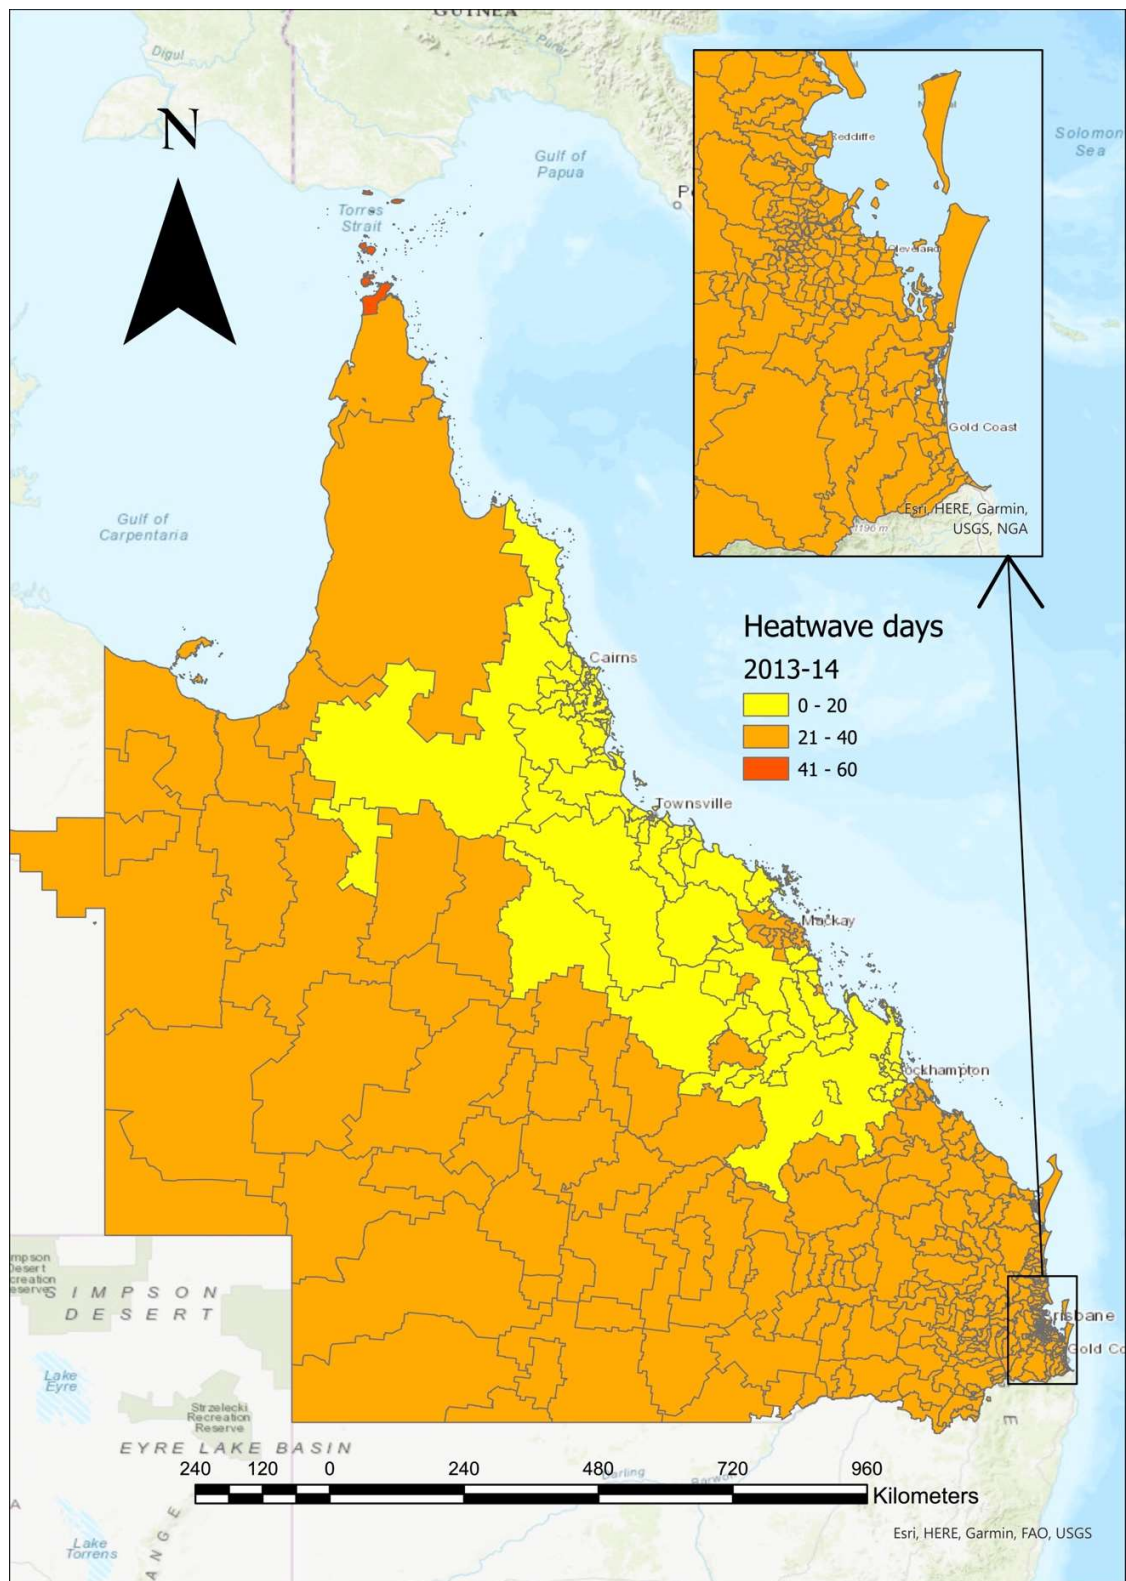

**Figure S6-** Number of heatwave days per postcode (Queensland; 2014-2015).

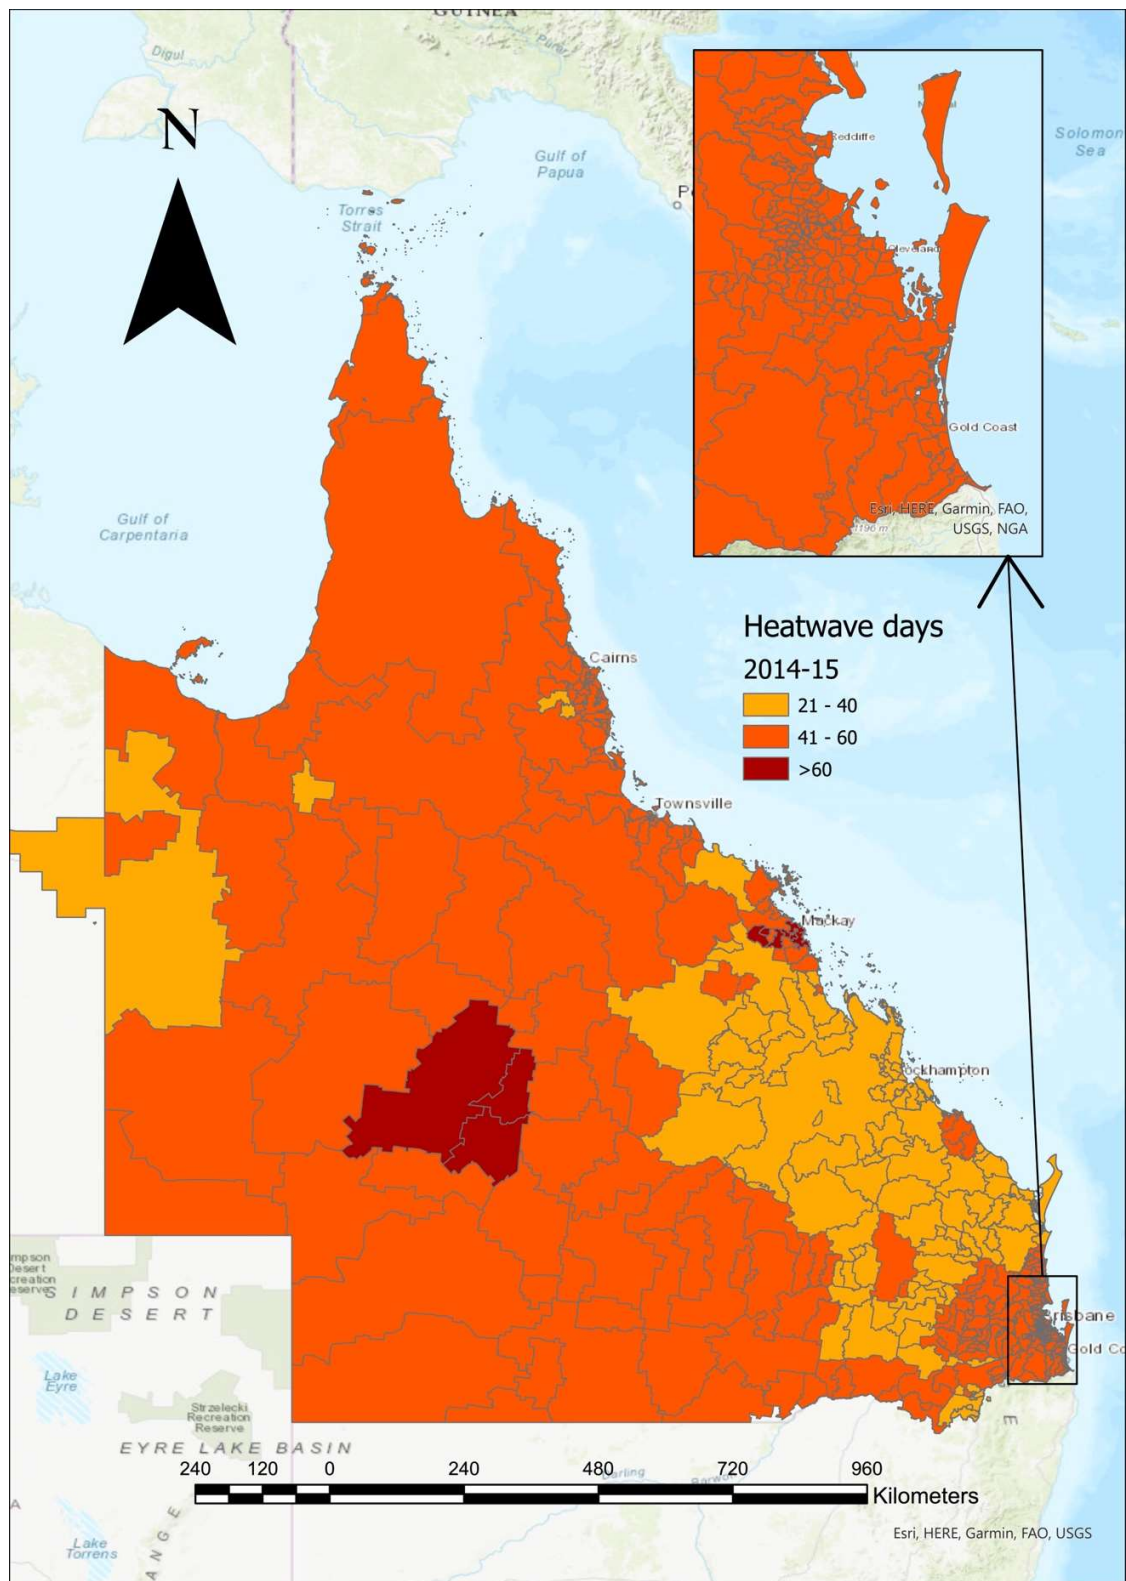

**Figure S7-** Number of heatwave days per postcode (Queensland; 2015-2016).

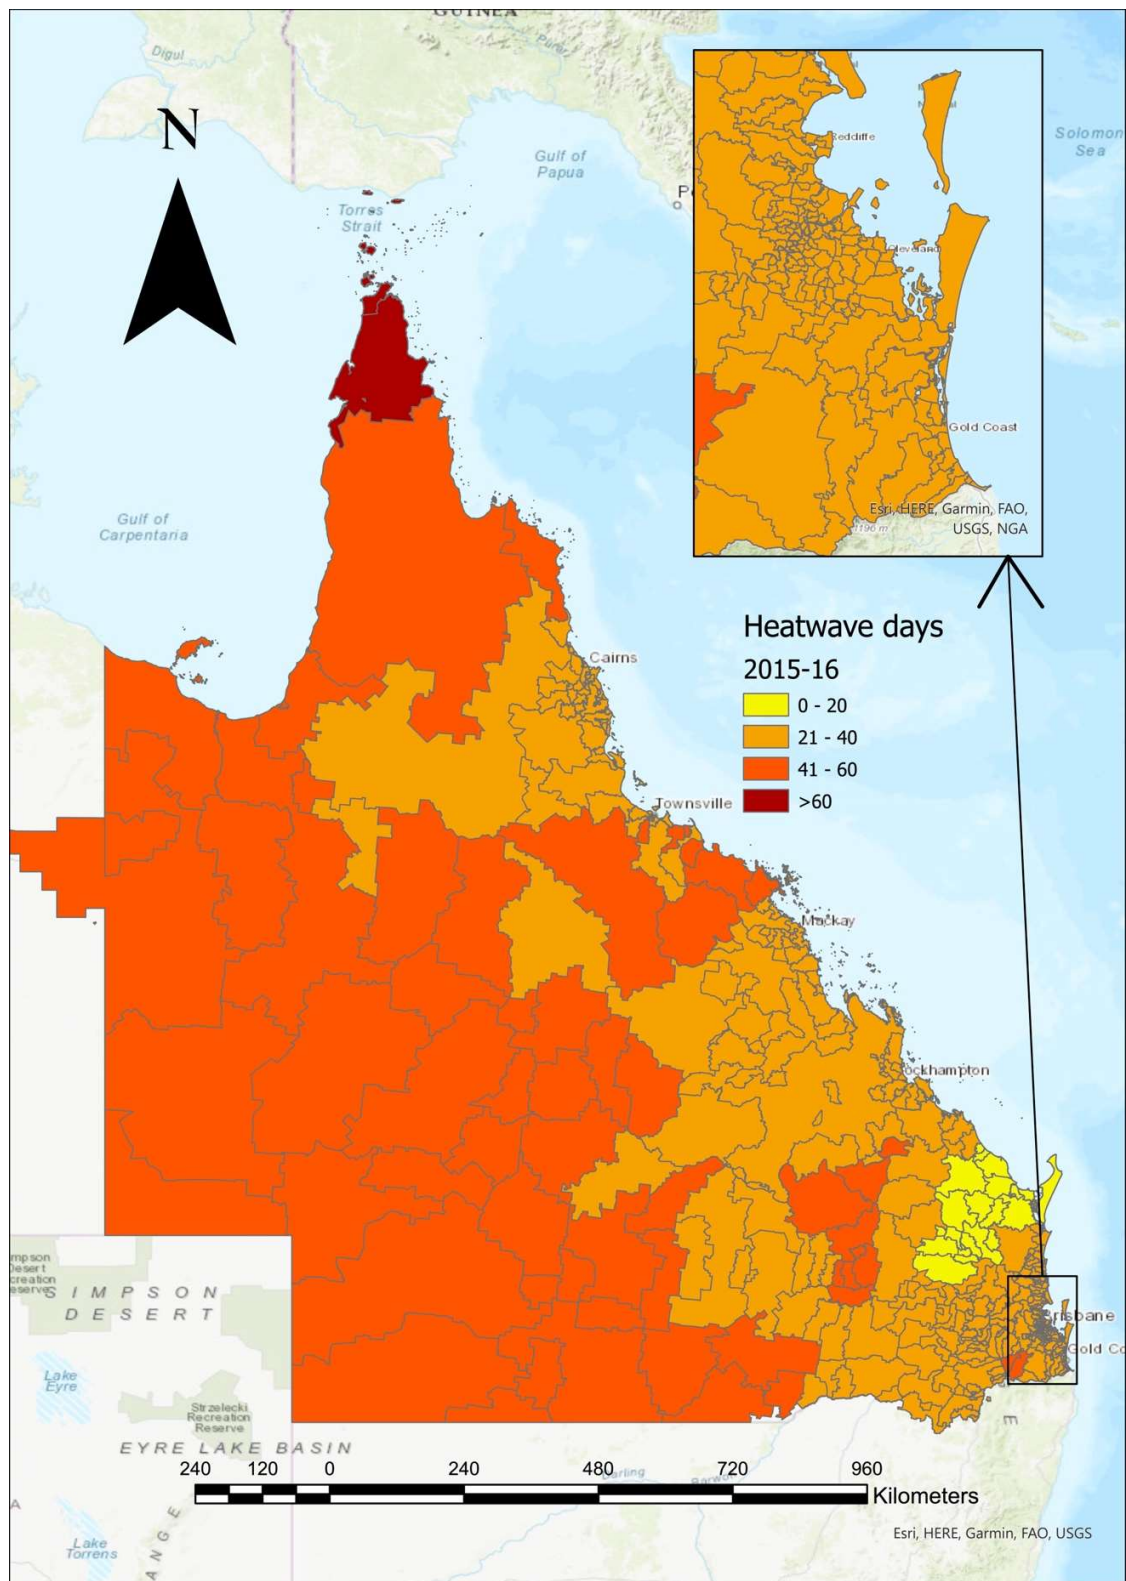

**Figure S8-** Number of heatwave days per postcode (Queensland; 2016-2017).

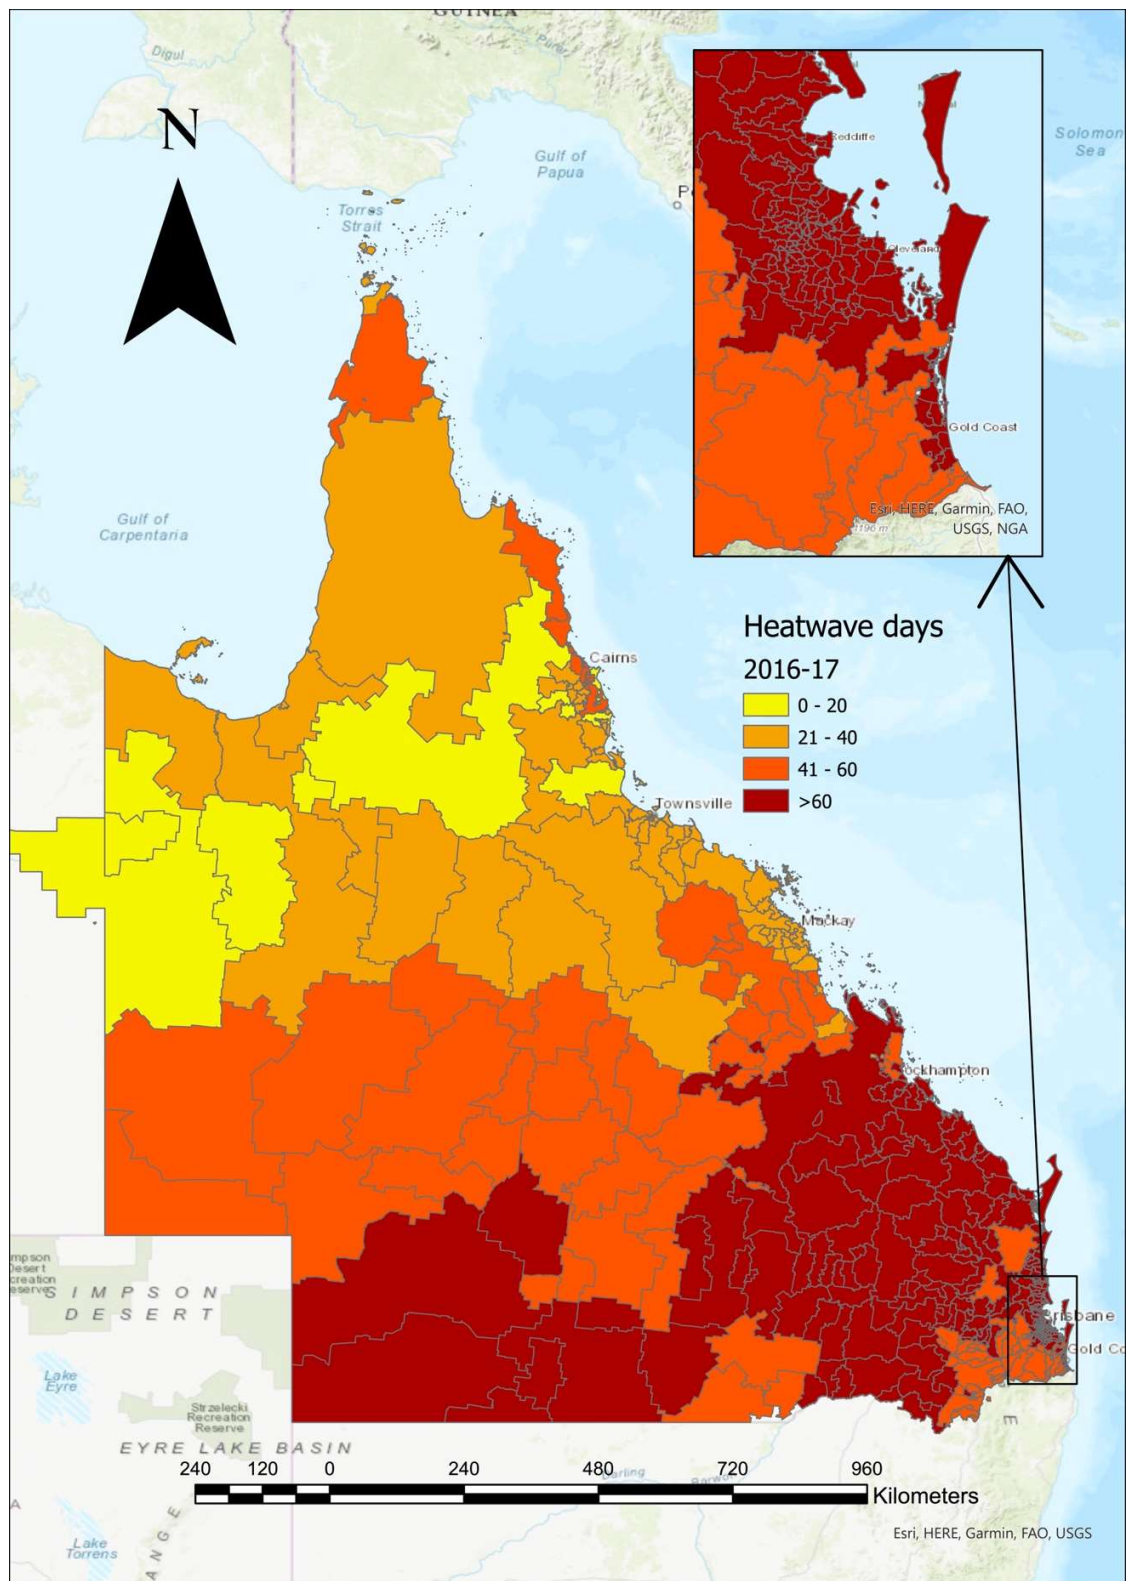

**Figure S9-** Number of heatwave days per postcode (Queensland; 2017-2018).

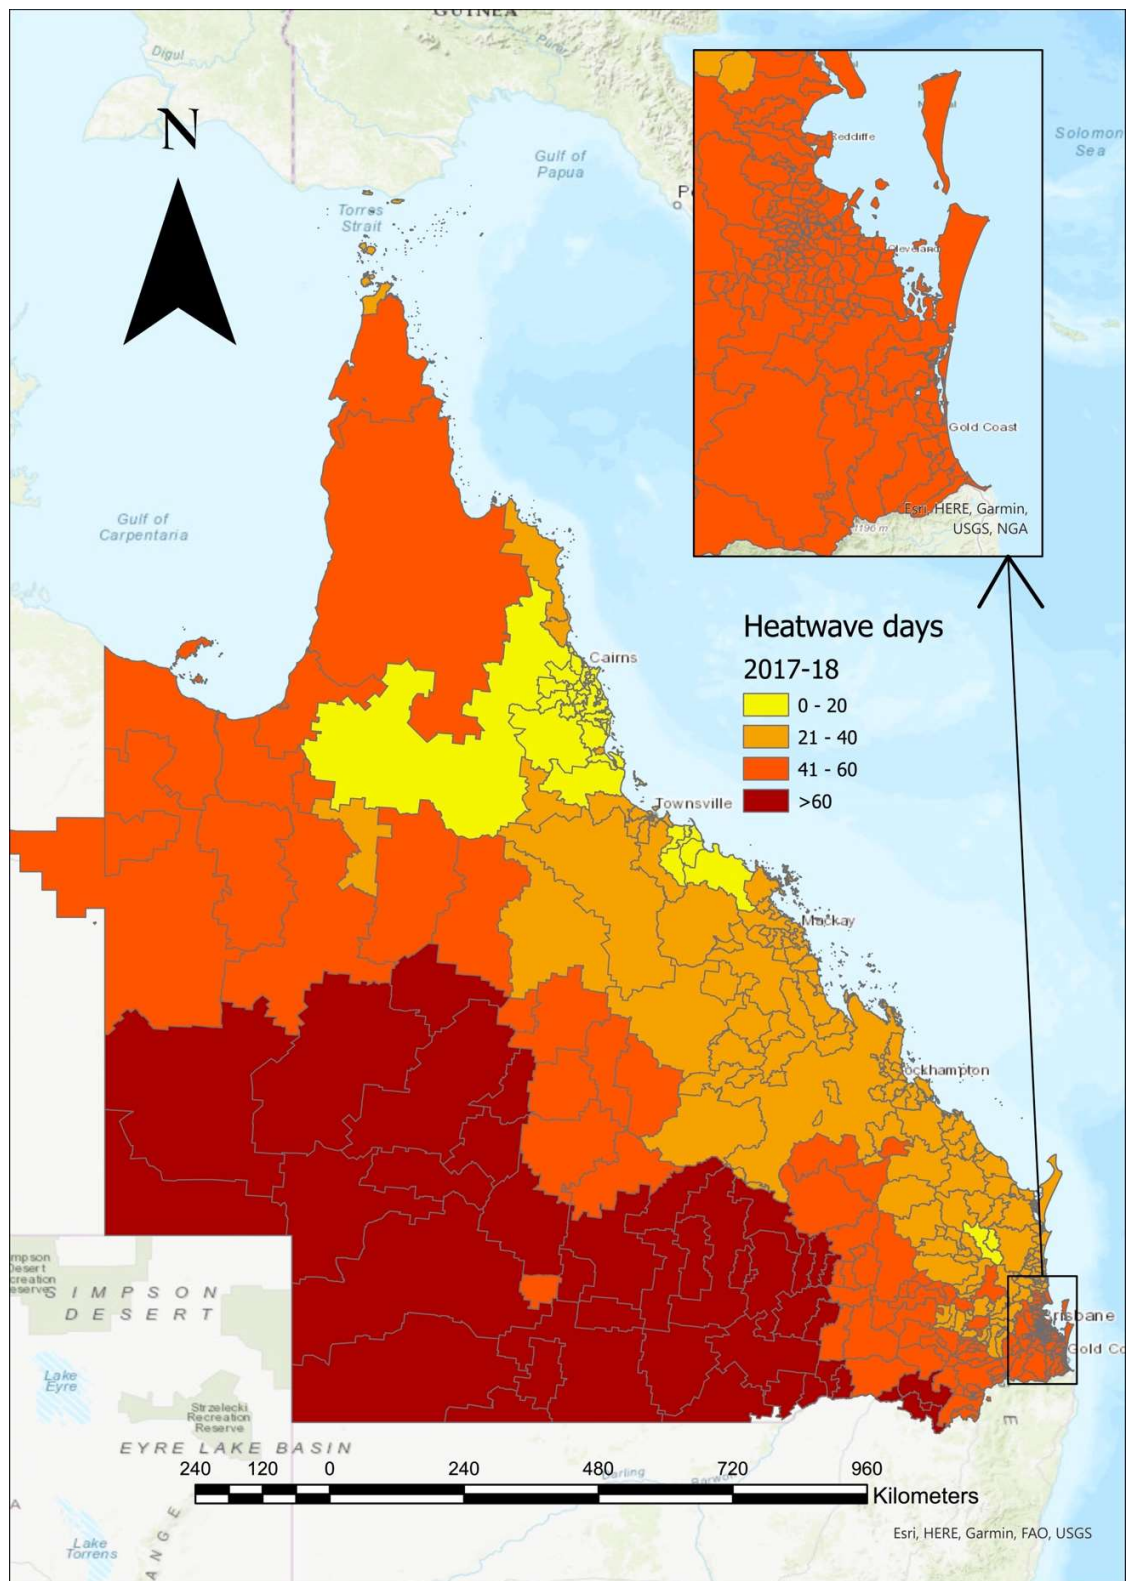

**Figure S10-** Number of heatwave days per postcode (Queensland; 2018-2019).

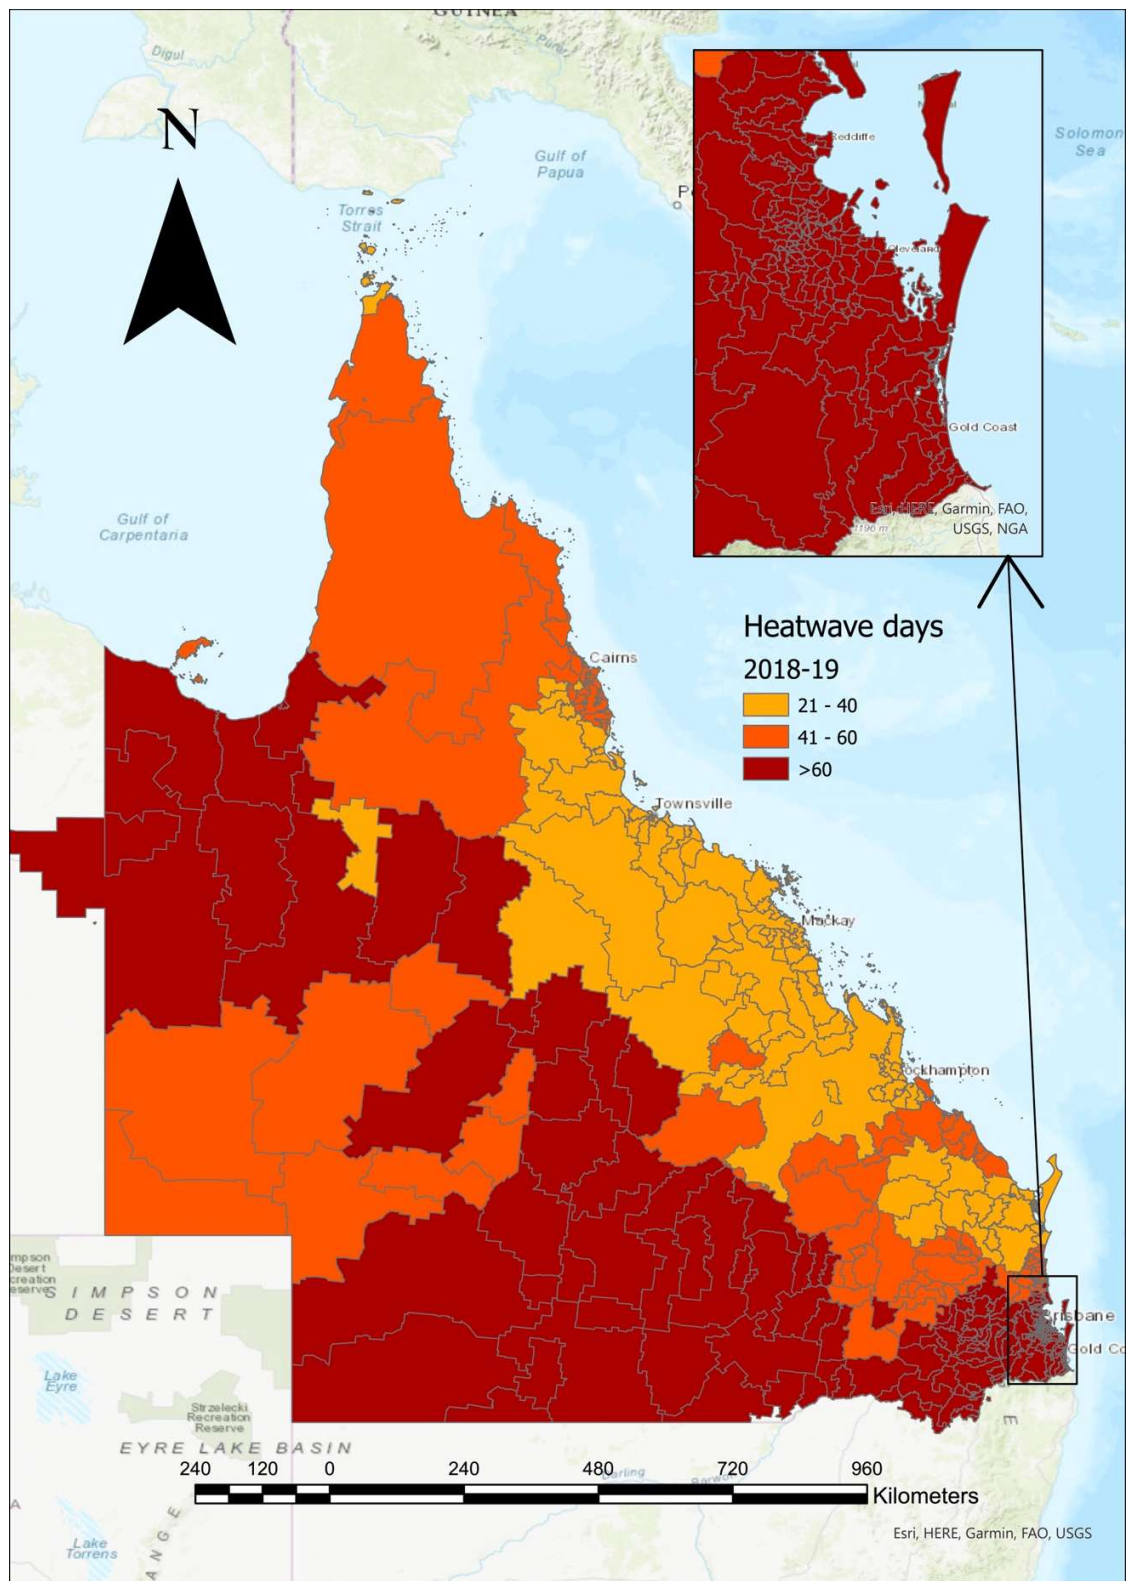

**Figure S11-** Proportion of ambulance calls by hour of the day for heatwaves vs. non-heatwave days (Queensland; 01 January 2010 to 31 December 2019)

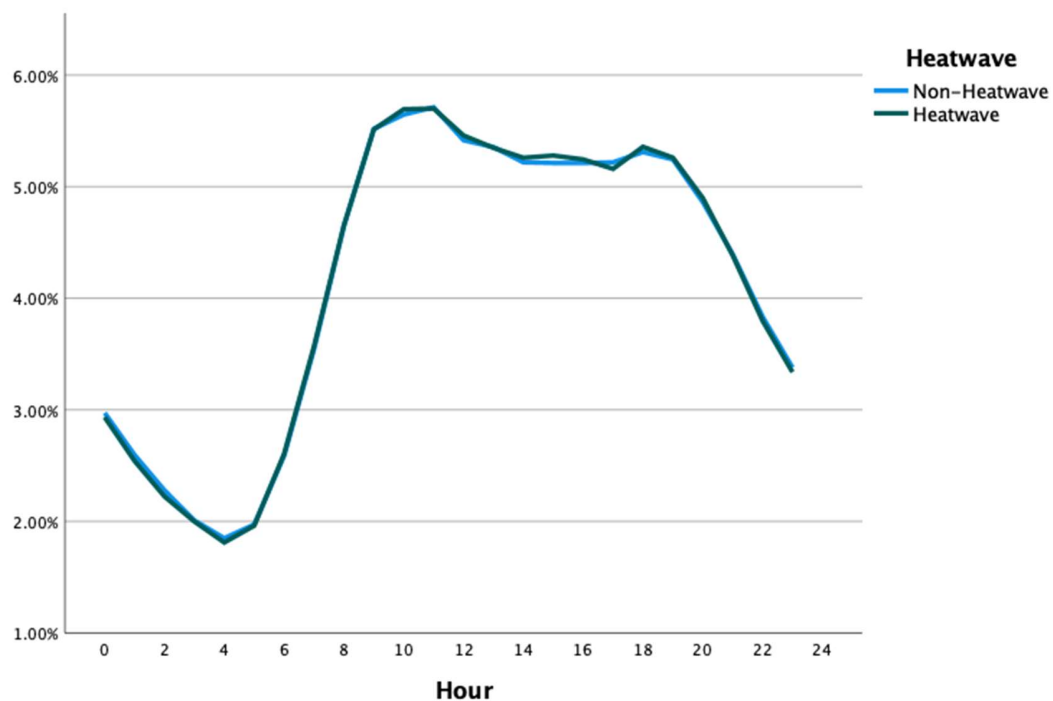

**Figure S12-** Crosstabulation and chi-square analysis of heatwave by hour of the day

| Hour * Heatwave Crosstabulation |                   |          |        |         | Chi-Square Tests                                                                           |                     |    |                                   |
|---------------------------------|-------------------|----------|--------|---------|--------------------------------------------------------------------------------------------|---------------------|----|-----------------------------------|
| Hour                            |                   | Heatwave |        | Total   |                                                                                            | Value               | df | Asymptotic Significance (2-sided) |
|                                 |                   | 0        | 1      |         |                                                                                            |                     |    |                                   |
| 0                               | Count             | 52163    | 21724  | 73887   | Pearson Chi-Square                                                                         | 44.357 <sup>a</sup> | 23 | .005                              |
|                                 | % within Heatwave | 3.0%     | 2.9%   | 3.0%    | Likelihood Ratio                                                                           | 44.405              | 23 | .005                              |
| 1                               | Count             | 45546    | 18820  | 64366   | Linear-by-Linear Association                                                               | 3.575               | 1  | .059                              |
|                                 | % within Heatwave | 2.6%     | 2.5%   | 2.6%    | N of Valid Cases                                                                           | 2495269             |    |                                   |
| 2                               | Count             | 39984    | 16462  | 56446   | a. 0 cells (0.0%) have expected count less than 5. The minimum expected count is 13606.55. |                     |    |                                   |
|                                 | % within Heatwave | 2.3%     | 2.2%   | 2.3%    |                                                                                            |                     |    |                                   |
| 3                               | Count             | 35244    | 14800  | 50044   |                                                                                            |                     |    |                                   |
|                                 | % within Heatwave | 2.0%     | 2.0%   | 2.0%    |                                                                                            |                     |    |                                   |
| 4                               | Count             | 32447    | 13409  | 45856   |                                                                                            |                     |    |                                   |
|                                 | % within Heatwave | 1.8%     | 1.8%   | 1.8%    |                                                                                            |                     |    |                                   |
| 5                               | Count             | 34612    | 14524  | 49136   |                                                                                            |                     |    |                                   |
|                                 | % within Heatwave | 2.0%     | 2.0%   | 2.0%    |                                                                                            |                     |    |                                   |
| 6                               | Count             | 45425    | 19292  | 64717   |                                                                                            |                     |    |                                   |
|                                 | % within Heatwave | 2.6%     | 2.6%   | 2.6%    |                                                                                            |                     |    |                                   |
| 7                               | Count             | 62199    | 26429  | 88628   |                                                                                            |                     |    |                                   |
|                                 | % within Heatwave | 3.5%     | 3.6%   | 3.6%    |                                                                                            |                     |    |                                   |
| 8                               | Count             | 81582    | 34460  | 116042  |                                                                                            |                     |    |                                   |
|                                 | % within Heatwave | 4.6%     | 4.7%   | 4.7%    |                                                                                            |                     |    |                                   |
| 9                               | Count             | 96850    | 40826  | 137676  |                                                                                            |                     |    |                                   |
|                                 | % within Heatwave | 5.5%     | 5.5%   | 5.5%    |                                                                                            |                     |    |                                   |
| 10                              | Count             | 99096    | 42163  | 141259  |                                                                                            |                     |    |                                   |
|                                 | % within Heatwave | 5.6%     | 5.7%   | 5.7%    |                                                                                            |                     |    |                                   |
| 11                              | Count             | 100240   | 42210  | 142450  |                                                                                            |                     |    |                                   |
|                                 | % within Heatwave | 5.7%     | 5.7%   | 5.7%    |                                                                                            |                     |    |                                   |
| 12                              | Count             | 95056    | 40422  | 135478  |                                                                                            |                     |    |                                   |
|                                 | % within Heatwave | 5.4%     | 5.5%   | 5.4%    |                                                                                            |                     |    |                                   |
| 13                              | Count             | 93985    | 39603  | 133588  |                                                                                            |                     |    |                                   |
|                                 | % within Heatwave | 5.4%     | 5.3%   | 5.4%    |                                                                                            |                     |    |                                   |
| 14                              | Count             | 91584    | 38942  | 130526  |                                                                                            |                     |    |                                   |
|                                 | % within Heatwave | 5.2%     | 5.3%   | 5.2%    |                                                                                            |                     |    |                                   |
| 15                              | Count             | 91488    | 39090  | 130578  |                                                                                            |                     |    |                                   |
|                                 | % within Heatwave | 5.2%     | 5.3%   | 5.2%    |                                                                                            |                     |    |                                   |
| 16                              | Count             | 91474    | 38833  | 130307  |                                                                                            |                     |    |                                   |
|                                 | % within Heatwave | 5.2%     | 5.2%   | 5.2%    |                                                                                            |                     |    |                                   |
| 17                              | Count             | 91579    | 38207  | 129786  |                                                                                            |                     |    |                                   |
|                                 | % within Heatwave | 5.2%     | 5.2%   | 5.2%    |                                                                                            |                     |    |                                   |
| 18                              | Count             | 93199    | 39670  | 132869  |                                                                                            |                     |    |                                   |
|                                 | % within Heatwave | 5.3%     | 5.4%   | 5.3%    |                                                                                            |                     |    |                                   |
| 19                              | Count             | 92050    | 38949  | 130999  |                                                                                            |                     |    |                                   |
|                                 | % within Heatwave | 5.2%     | 5.3%   | 5.2%    |                                                                                            |                     |    |                                   |
| 20                              | Count             | 85339    | 36274  | 121613  |                                                                                            |                     |    |                                   |
|                                 | % within Heatwave | 4.9%     | 4.9%   | 4.9%    |                                                                                            |                     |    |                                   |
| 21                              | Count             | 77132    | 32461  | 109593  |                                                                                            |                     |    |                                   |
|                                 | % within Heatwave | 4.4%     | 4.4%   | 4.4%    |                                                                                            |                     |    |                                   |
| 22                              | Count             | 67292    | 28119  | 95411   |                                                                                            |                     |    |                                   |
|                                 | % within Heatwave | 3.8%     | 3.8%   | 3.8%    |                                                                                            |                     |    |                                   |
| 23                              | Count             | 59298    | 24716  | 84014   |                                                                                            |                     |    |                                   |
|                                 | % within Heatwave | 3.4%     | 3.3%   | 3.4%    |                                                                                            |                     |    |                                   |
| Total                           | Count             | 1754864  | 740405 | 2495269 |                                                                                            |                     |    |                                   |
|                                 | % within Heatwave | 100.0%   | 100.0% | 100.0%  |                                                                                            |                     |    |                                   |

**Figure S13-** Crosstabulation and chi-square analysis of heatwave by day of the week

Heatwave \* Monday=1, Sunday= 7 Crosstabulation

|                     |      | Heatwave       |                        | Total                  |           |  |
|---------------------|------|----------------|------------------------|------------------------|-----------|--|
|                     |      | 0              | 1                      |                        |           |  |
| Monday=1, Sunday= 7 | 1.00 | Count          | 254868 <sup>a</sup>    | 107017 <sup>a</sup>    | 361885    |  |
|                     |      | Expected Count | 254505.2               | 107379.8               | 361885.0  |  |
|                     | 2.00 | Count          | 250518 <sup>b</sup>    | 103080 <sup>b</sup>    | 353598    |  |
|                     |      | Expected Count | 248677.2               | 104920.8               | 353598.0  |  |
|                     | 3.00 | Count          | 253208 <sup>c</sup>    | 109972 <sup>c</sup>    | 363180    |  |
|                     |      | Expected Count | 255416.0               | 107764.0               | 363180.0  |  |
|                     | 4.00 | Count          | 242264 <sup>d</sup>    | 108915 <sup>d</sup>    | 351179    |  |
|                     |      | Expected Count | 246975.9               | 104203.1               | 351179.0  |  |
|                     | 5.00 | Count          | 253195 <sup>e</sup>    | 97188 <sup>e</sup>     | 350383    |  |
|                     |      | Expected Count | 246416.1               | 103966.9               | 350383.0  |  |
|                     | 6.00 | Count          | 248289 <sup>a, b</sup> | 103368 <sup>a, b</sup> | 351657    |  |
|                     |      | Expected Count | 247312.1               | 104344.9               | 351657.0  |  |
|                     | 7.00 | Count          | 252522 <sup>c</sup>    | 110865 <sup>c</sup>    | 363387    |  |
|                     |      | Expected Count | 255561.5               | 107825.5               | 363387.0  |  |
| Total               |      | Count          | 1754864                | 740405                 | 2495269   |  |
|                     |      | Expected Count | 1754864.0              | 740405.0               | 2495269.0 |  |

Each subscript letter denotes a subset of Monday=1, Sunday= 7 categories whose column proportions do not differ significantly from each other at the .05 level.

Chi-Square Tests

|                              | Value                 | df | Asymptotic Significance (2-sided) |
|------------------------------|-----------------------|----|-----------------------------------|
| Pearson Chi-Square           | 1178.279 <sup>a</sup> | 6  | <.001                             |
| Likelihood Ratio             | 1183.242              | 6  | <.001                             |
| Linear-by-Linear Association | 4.139                 | 1  | .042                              |
| N of Valid Cases             | 2495269               |    |                                   |

a. 0 cells (0.0%) have expected count less than 5. The minimum expected count is 103966.88.

**Figure S14-** Crosstabulation and chi-square analysis of heatwave by medical condition

| BroadMPDS * Heatwave Crosstabulation |                   |                |                     |                     | Chi-Square Tests |    |                                   |
|--------------------------------------|-------------------|----------------|---------------------|---------------------|------------------|----|-----------------------------------|
|                                      |                   | Heatwave       |                     | Total               | Value            | df | Asymptotic Significance (2-sided) |
|                                      |                   | 0              | 1                   |                     |                  |    |                                   |
| BroadMPDS                            | Cardiac           | Count          | 206837 <sup>a</sup> | 85673 <sup>b</sup>  | 292510           |    |                                   |
|                                      |                   | Expected Count | 205715.4            | 86794.6             | 292510.0         |    |                                   |
|                                      | Cold exposure     | Count          | 84 <sup>a</sup>     | 37 <sup>a</sup>     | 121              |    |                                   |
|                                      |                   | Expected Count | 85.1                | 35.9                | 121.0            |    |                                   |
|                                      | Heat exposure     | Count          | 2096 <sup>a</sup>   | 3278 <sup>b</sup>   | 5374             |    |                                   |
|                                      |                   | Expected Count | 3779.4              | 1594.6              | 5374.0           |    |                                   |
|                                      | Injuries          | Count          | 481238 <sup>a</sup> | 193272 <sup>b</sup> | 674510           |    |                                   |
|                                      |                   | Expected Count | 474367.0            | 200143.0            | 674510.0         |    |                                   |
|                                      | Mental Health     | Count          | 80745 <sup>a</sup>  | 37567 <sup>b</sup>  | 118312           |    |                                   |
|                                      |                   | Expected Count | 83206.0             | 35106.0             | 118312.0         |    |                                   |
|                                      | Obstetric         | Count          | 16218 <sup>a</sup>  | 6586 <sup>b</sup>   | 22804            |    |                                   |
|                                      |                   | Expected Count | 16037.5             | 6766.5              | 22804.0          |    |                                   |
|                                      | Other/Transport   | Count          | 247108 <sup>a</sup> | 106931 <sup>b</sup> | 354039           |    |                                   |
|                                      |                   | Expected Count | 248987.3            | 105051.7            | 354039.0         |    |                                   |
|                                      | Respiratory       | Count          | 128722 <sup>a</sup> | 51917 <sup>b</sup>  | 180639           |    |                                   |
|                                      |                   | Expected Count | 127039.2            | 53599.8             | 180639.0         |    |                                   |
|                                      | Specified Medical | Count          | 563287 <sup>a</sup> | 243322 <sup>b</sup> | 806609           |    |                                   |
|                                      |                   | Expected Count | 567269.1            | 239339.9            | 806609.0         |    |                                   |
|                                      | Stroke            | Count          | 28529 <sup>a</sup>  | 11822 <sup>a</sup>  | 40351            |    |                                   |
|                                      |                   | Expected Count | 28377.9             | 11973.1             | 40351.0          |    |                                   |
| Total                                |                   | Count          | 1754864             | 740405              | 2495269          |    |                                   |
|                                      |                   | Expected Count | 1754864.0           | 740405.0            | 2495269.0        |    |                                   |

Each subscript letter denotes a subset of Heatwave categories whose column proportions do not differ significantly from each other at the .05 level.

|                    | Value                 | df | Asymptotic Significance (2-sided) |
|--------------------|-----------------------|----|-----------------------------------|
| Pearson Chi-Square | 3355.065 <sup>a</sup> | 9  | .000                              |
| Likelihood Ratio   | 3080.295              | 9  | .000                              |
| N of Valid Cases   | 2495269               |    |                                   |

a. 0 cells (0.0%) have expected count less than 5. The minimum expected count is 35.90.
